# Supplementary material for: Stabilizing ruthenium dioxide with cation-anchored sulfate for durable oxygen evolution in PEMWE
Source: Research Square preprint supplement (doi:10.21203/rs.3.rs-2713365/v1), 2023-06-06
Supplement: Supplementary file 1 [file bd885105a6336d43d41b8046.docx]

Supplementary Information for

**Stabilizing ruthenium dioxide with cation-anchored sulfate for durable oxygen evolution in PEMWE**

Yanrong Xue,1,2,6 Jiwu Zhao,1,2,6 Liang Huang,1,2 Ying-Rui Lu,3 Abdul Malek,1,2 Ge Gao,1,2 Zhongbin Zhuang,4 Dingsheng Wang,5 Xu Lu1,2*

1 CCRC, Division of Physical Science and Engineering (PSE), King Abdullah University of Science and Technology (KAUST), Thuwal, 23955-6900, Kingdom of Saudi Arabia.

2 KAUST Solar Center (KSC), PSE, KAUST.

3 National Synchrotron Radiation Research Center, Hsinchu 300, Taiwan.

4 State Key Lab of Organic-Inorganic Composites, Beijing University of Chemical Technology, 100029 Beijing, China.

5 Department of Chemistry, Tsinghua University, Beijing 100084, China.

6 These authors contributed equally.

* Corresponding author. Email: Xu Lu (xu.lu@kaust.edu.sa).

**Table of contents**

Supplementary Figures 1-21 Page 3-23

Supplementary Notes 1-3 Page 3, 6, 22

Supplementary Tables 1-6 Page 24-29

Supplementary References 1-15 Page 30

**Supplementary Figures**


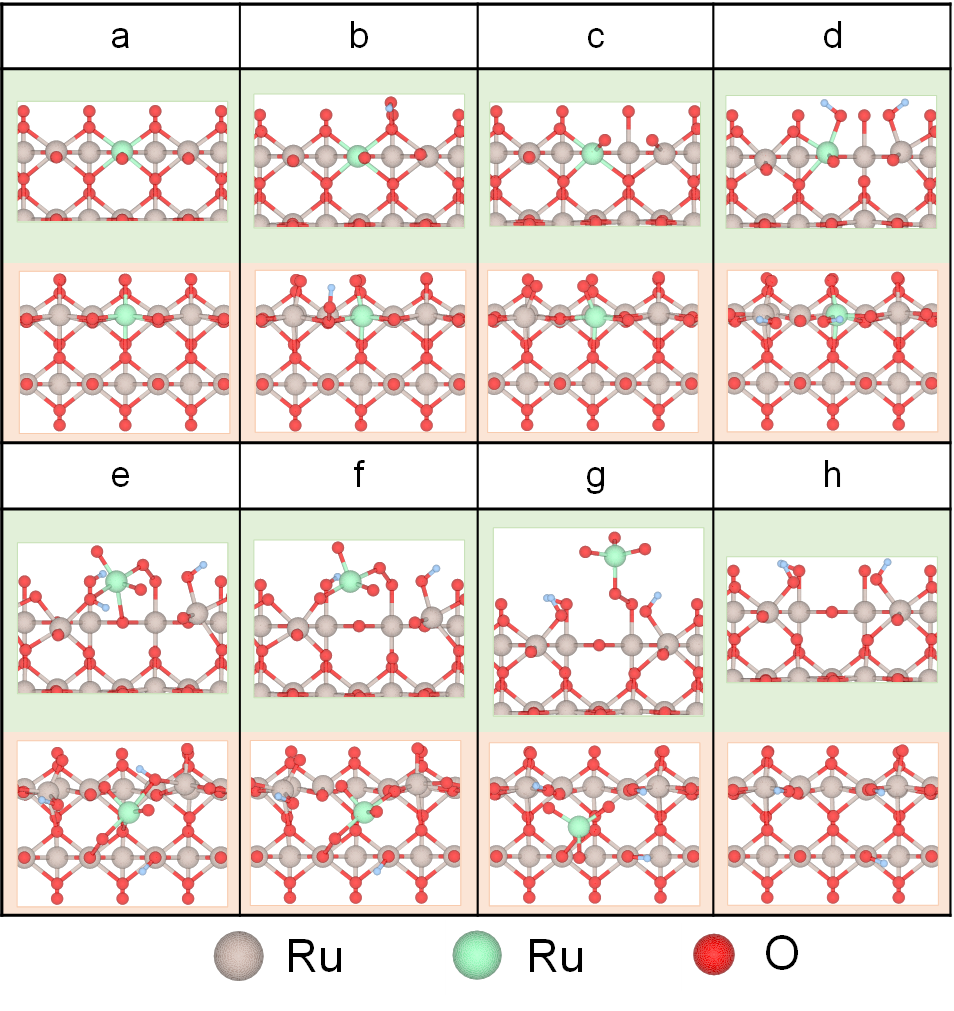


**Supplementary Figure 1** Atomic structure of RuO2 and intermediates during Ru dissolution. Of note, the green ball represents the Ru atom on the grain edge.

**Supplementary Notes**

**Supplementary Note 1**: In this model, the dissolution of RuO2 undergoes the continuous adsorption of water and deprotonation on the 1f-cus Ru active sites. Then, the lattice O near the 1f-cus Ru active sites on the grain edges is over-oxidized and cracks. Finally, a soluble RuO4 is formed and lost from the grain edge.


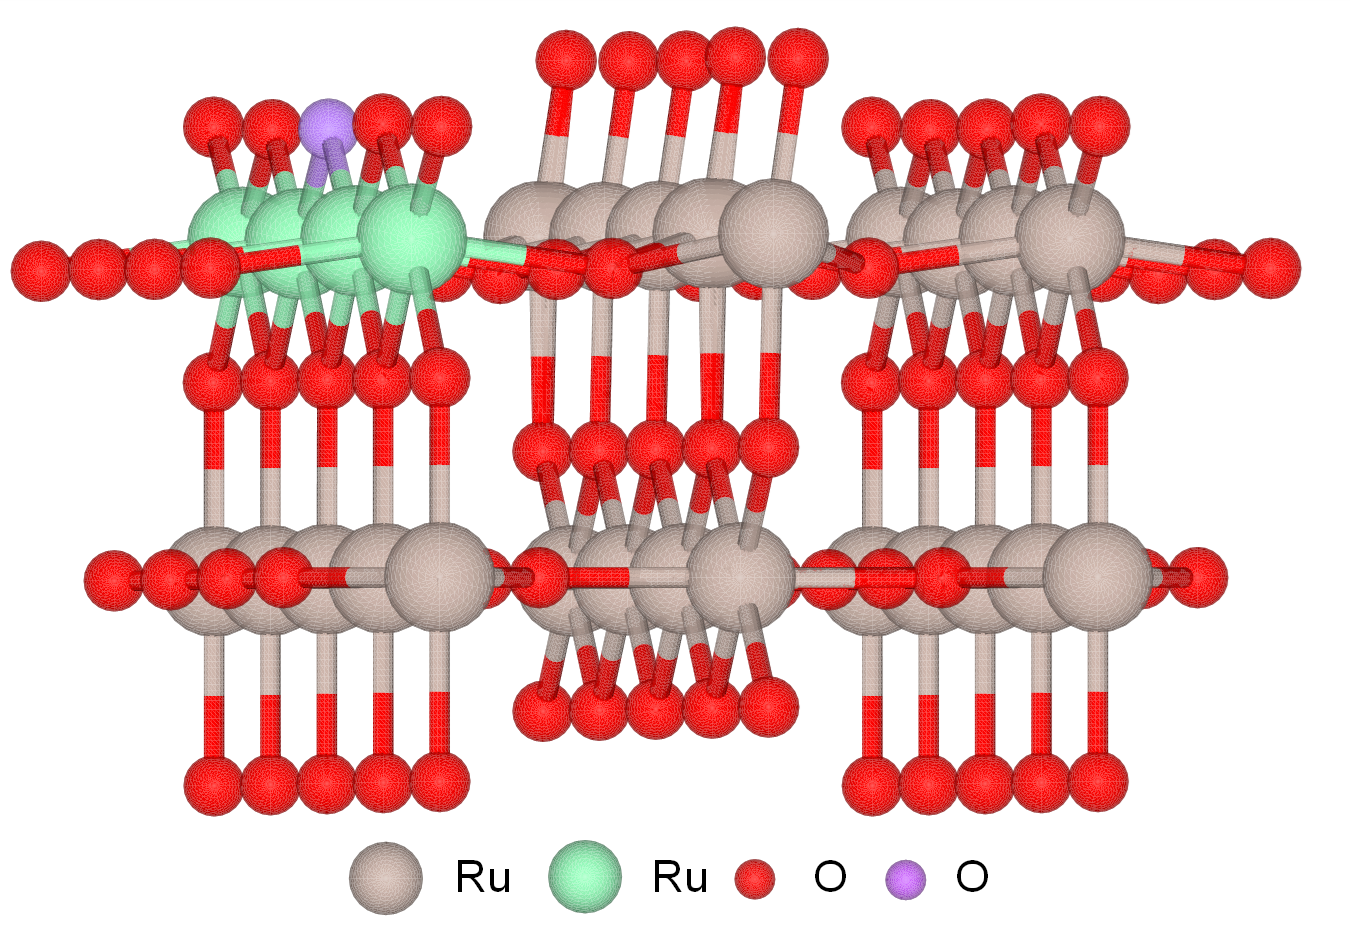


**Supplementary Figure 2** Ball-and-stick model of the RuO2 (110) plane. Of note, the green and purple balls represent Ru and O atoms, respectively, on the grain edges.


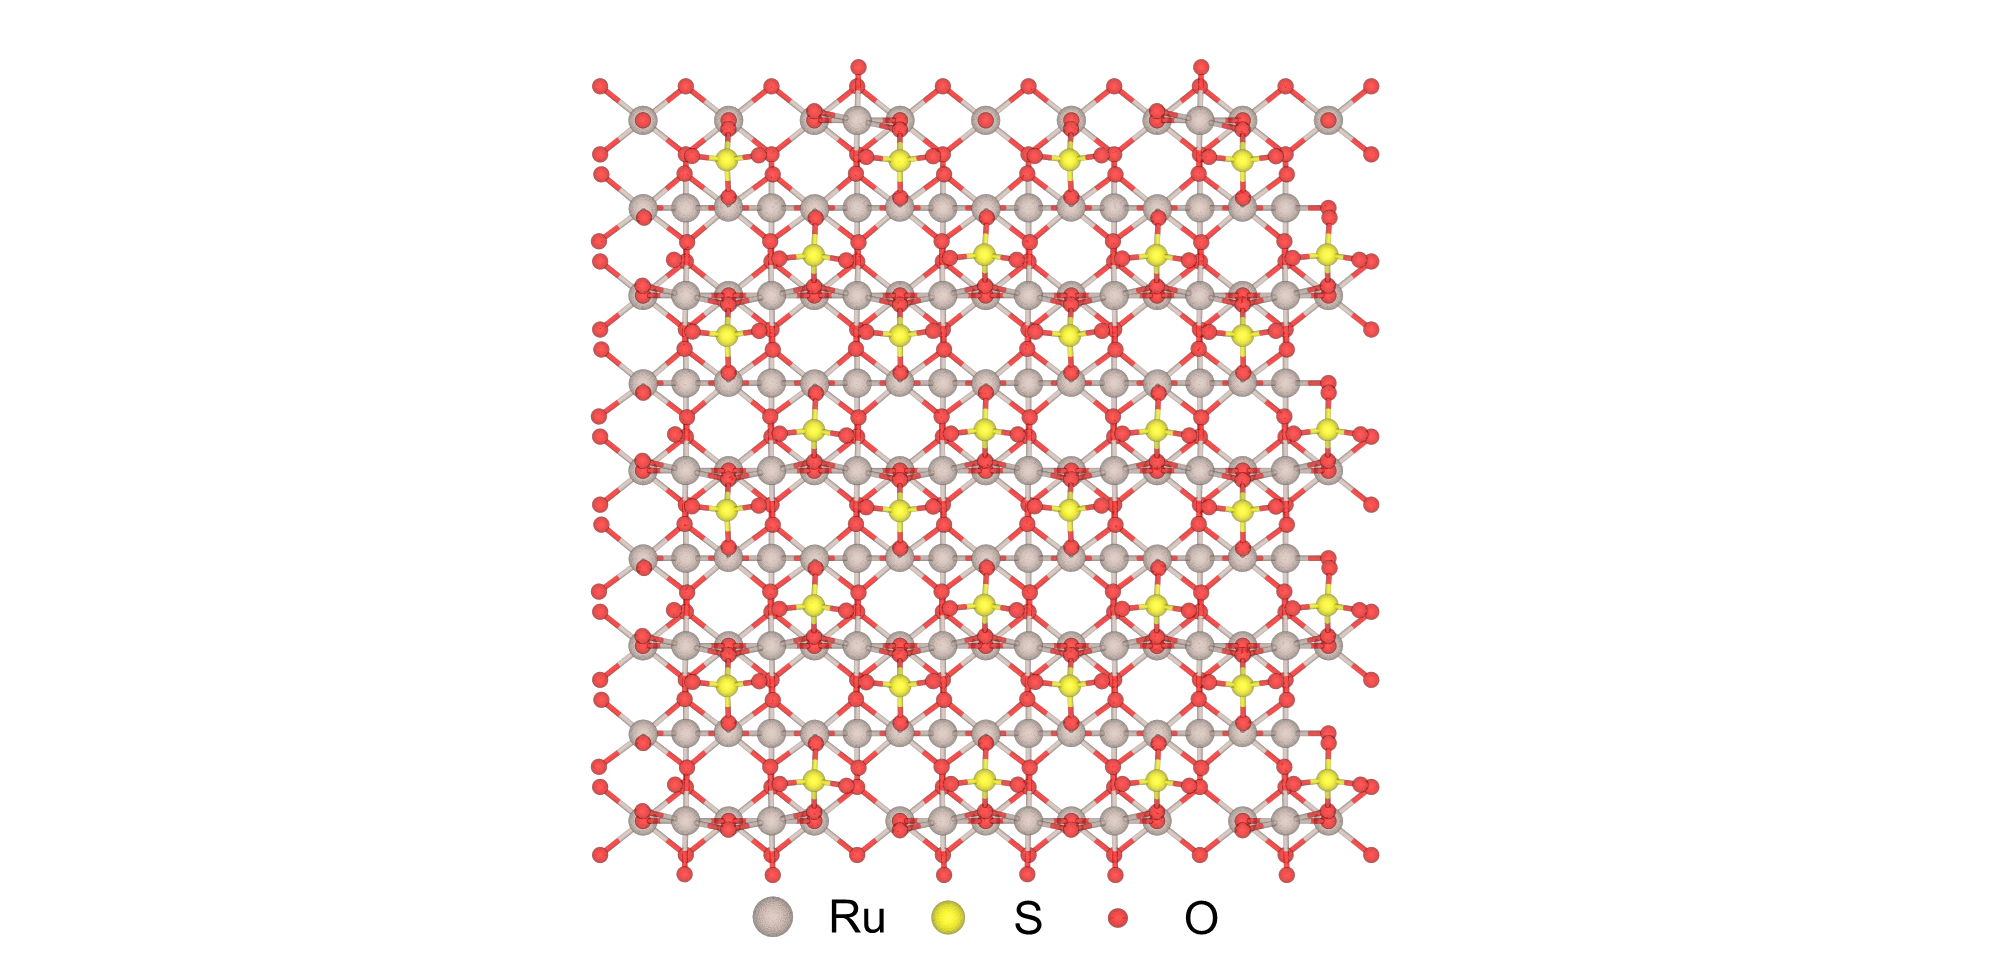


**Supplementary Figure 3** Ball-and-stick model of sulfate bound with RuO2 (110) facet.


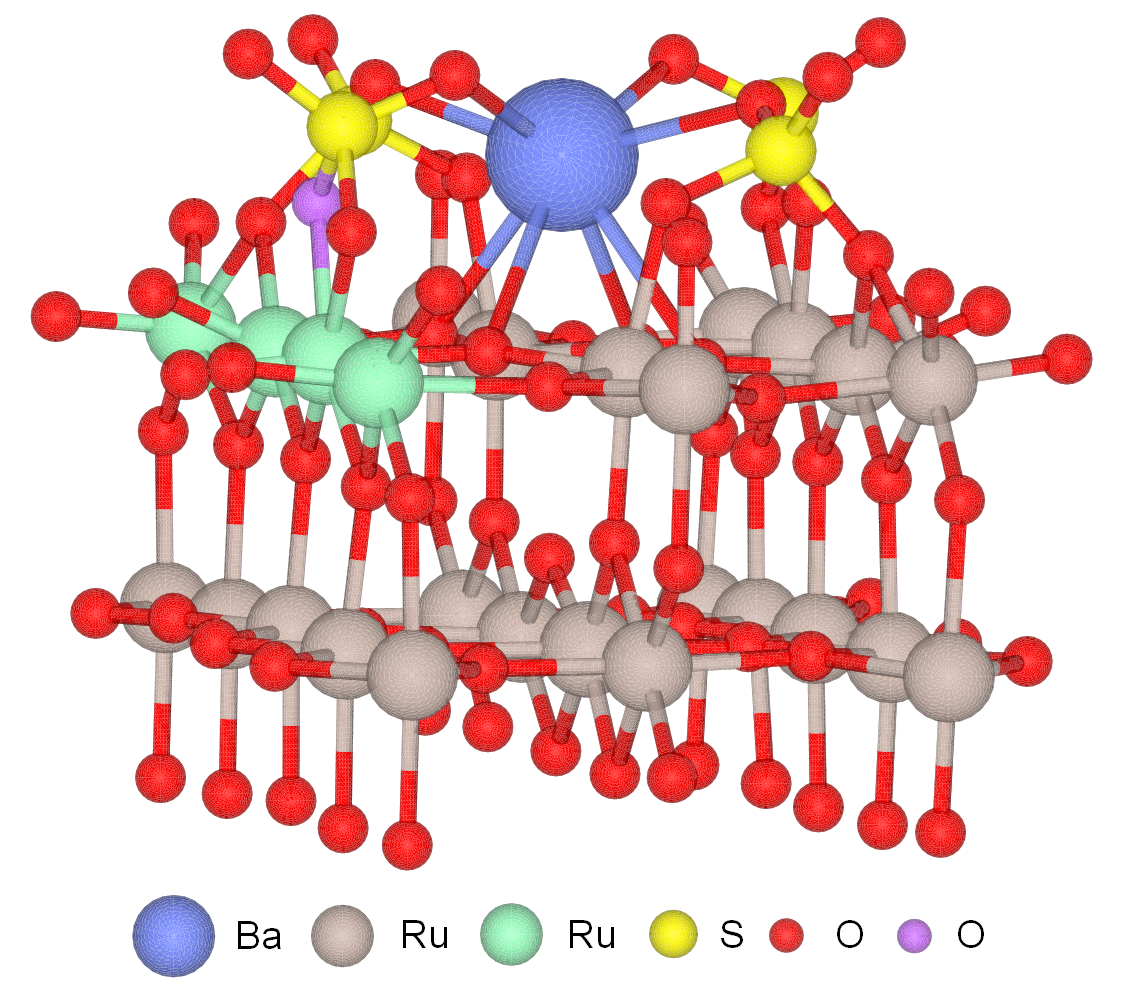


**Supplementary Figure 4** Ball-and-stick model of Ba-anchored sulfate on the RuO2 (110) plane. Of note, the green and purple balls represent Ru and O atoms, respectively, on the grain edges.

**Supplementary Note 2**: In this model, two O atoms of a sulfate bond to Ru atoms to form coordination-saturated lattice O, and Ba atom bonds with one O atom of sulfate to fix the sulfate on the RuO2 (110) plane. When calculating the binding energy of sulfate with other metal cations, Ba was replaced by other elements.

**Supplementary Figure 5** XRD pattern of Ba0.3(SO4)*δ*W0.2Ru0.5O2−*δ*.


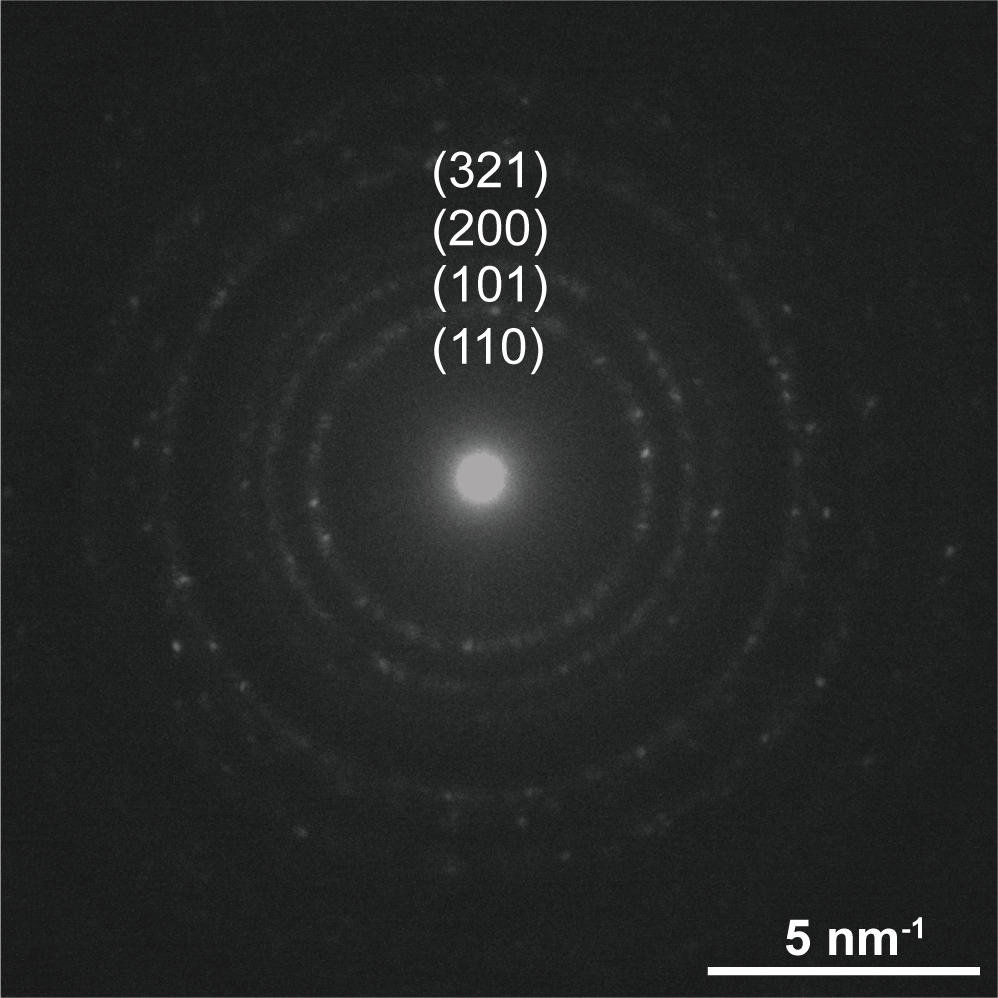


**Supplementary Figure 6** SAED pattern of the Ba0.3(SO4)*δ*W0.2Ru0.5O2−*δ*.


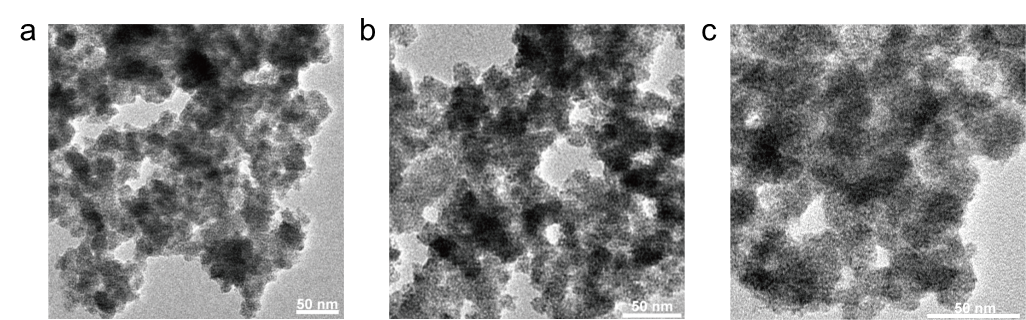


**Supplementary Figure 7 a-c**,TEM images of (**a**) Ba0.2(SO4)*δ*W0.1Ru0.7O2−*δ*, (**b**) Ba0.4(SO4)*δ*W0.2Ru0.4O2−*δ*, and (**c**) Ba0.4(SO4)*δ*W0.3Ru0.3O2−*δ*.


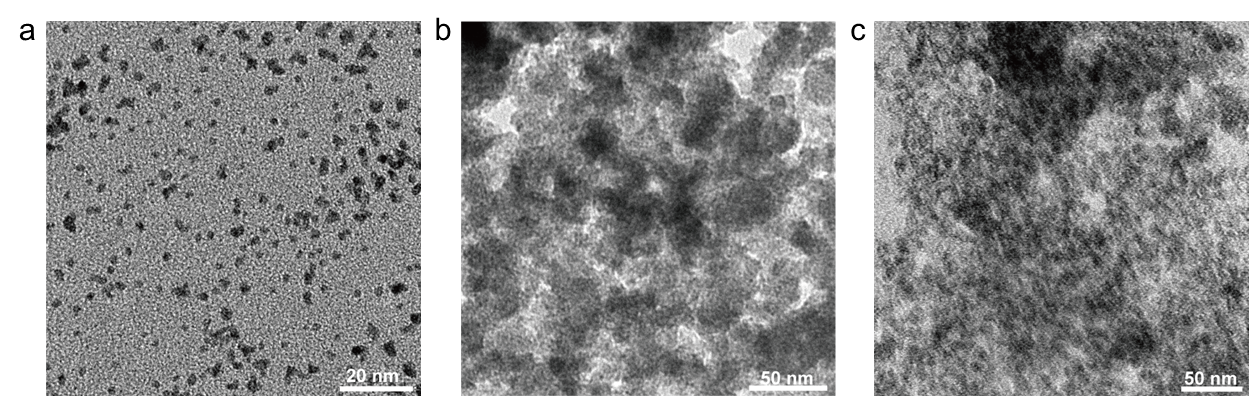


**Supplementary Figure 8 a-c**,TEM images of (**a**) W0.3Ru0.7O2, (**b**) (SO4)*δ*RuO2−*δ*, and (**c**) Ba0.4(SO4)*δ*Ru0.6O2−*δ*.

**Supplementary Figure 9** XRD patterns of W0.3Ru0.7O2, (SO4)*δ*RuO2−*δ*, and Ba0.4(SO4)*δ*Ru0.6O2−*δ*.

**Supplementary Figure 10** OER polarization curves of Ba0.2(SO4)*δ*W0.1Ru0.7O2−*δ*, Ba0.3(SO4)*δ*W0.2Ru0.5O2−*δ*, Ba0.4(SO4)*δ*W0.2Ru0.4O2−*δ*, and Ba0.4(SO4)*δ*W0.3Ru0.3O2−*δ*.

**Supplementary Figure 11** Nyquist plots of commercial RuO2, W0.3Ru0.7O2, (SO4)*δ*RuO2−*δ*, Ba0.4(SO4)*δ*Ru0.6O2−*δ*, and Ba0.3(SO4)*δ*W0.2Ru0.5O2−*δ*.


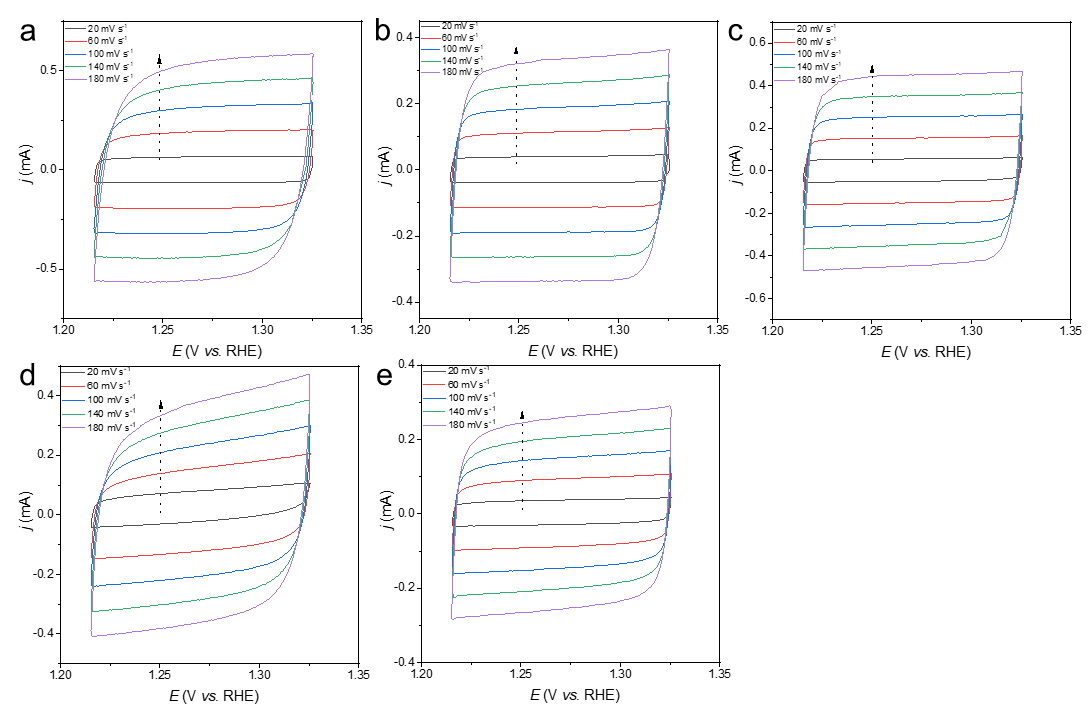


**Supplementary Figure 12 a-e**,Cyclic voltammograms of (**a**) commercial RuO2, (**b**) W0.3Ru0.7O2, (**c**) (SO4)*δ*RuO2−*δ*, (**d**) Ba0.4(SO4)*δ*Ru0.6O2−*δ*, and (**e**) Ba0.3(SO4)*δ*W0.2Ru0.5O2−*δ* at scan rates of 20, 60, 100, 140, and 180 mV s−1.

**Supplementary Figure 13** Chronopotentiogram of (SO4)*δ*RuO2−*δ* and Ba0.4(SO4)*δ*Ru0.6O2−*δ* at 10 mA cm−2 in 0.1 M HClO4.

**Supplementary Figure 14** OER polarization curves of commercial RuO2 and Ba0.3(SO4)*δ*W0.2Ru0.5O2−*δ* before and after 100,000 cycles.

**Supplementary Figure 15** Cyclic voltammograms of commercial RuO2, Ba0.4(SO4)*δ*Ru0.6O2−*δ*, and Ba0.3(SO4)*δ*W0.2Ru0.5O2−*δ* in Ar-saturated 0.5 M H2SO4 at a scan rate of 50 mV s−1.

**
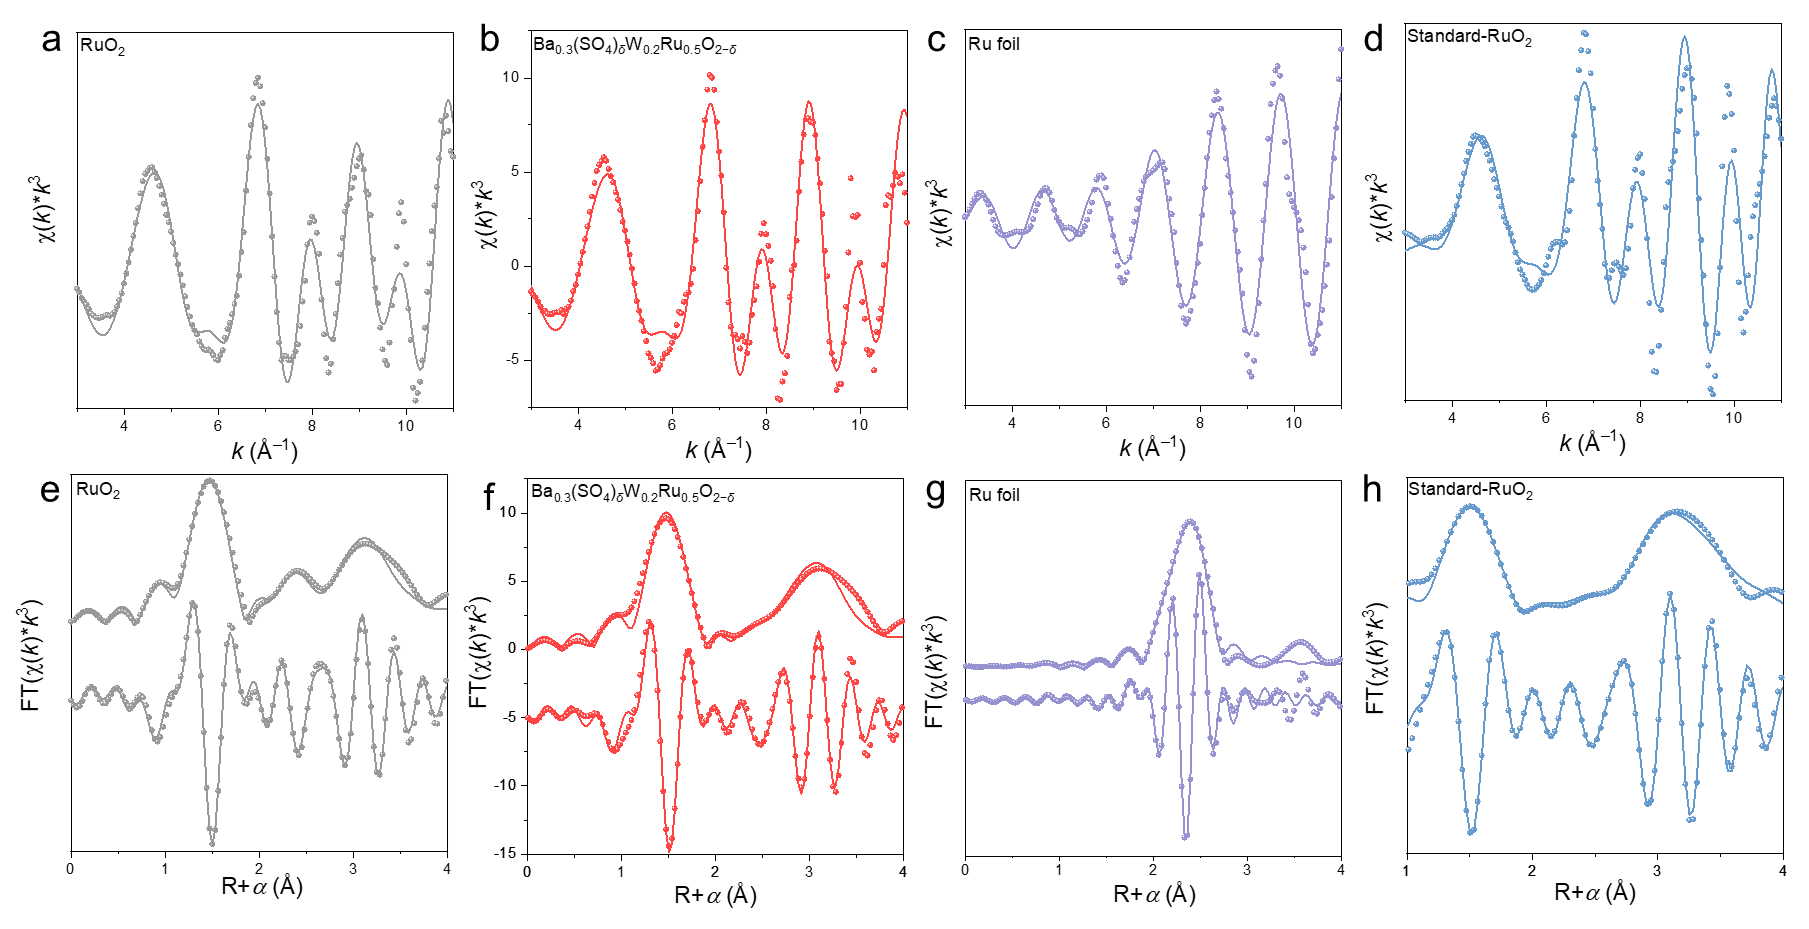
**

**Supplementary Figure 16 a-d**,Ru K-edge EXAFS (points) and the curvefit (line) for (**a**) RuO2, (**b**) Ba0.3(SO4)*δ*W0.2Ru0.5O2−*δ*, (**c**) Ru foil, and (**d**) standard-RuO2, shown in k3weighted *k*-space. **e-h**, Ru K-edge EXAFS (points) and the curvefit (line) for (**e**) RuO2, (**f**) Ba0.3(SO4)*δ*W0.2Ru0.5O2−*δ*, (**g**) Ru foil, and (**h**) standard-RuO2, shown in *R*-space (FT magnitude and imaginary component). The data are k3-weighted and not phase-corrected.

**Supplementary Figure 17** High-resolution O 1s XPS spectra of RuO2, (SO4)*δ*RuO2−*δ*, and Ba0.3(SO4)*δ*W0.2Ru0.5O2−*δ* before and after OER.

**Supplementary Figure 18** Time-resolved *in-situ* XRD patterns of RuO2 during 200 min acidic OER at 1.55 V.

**
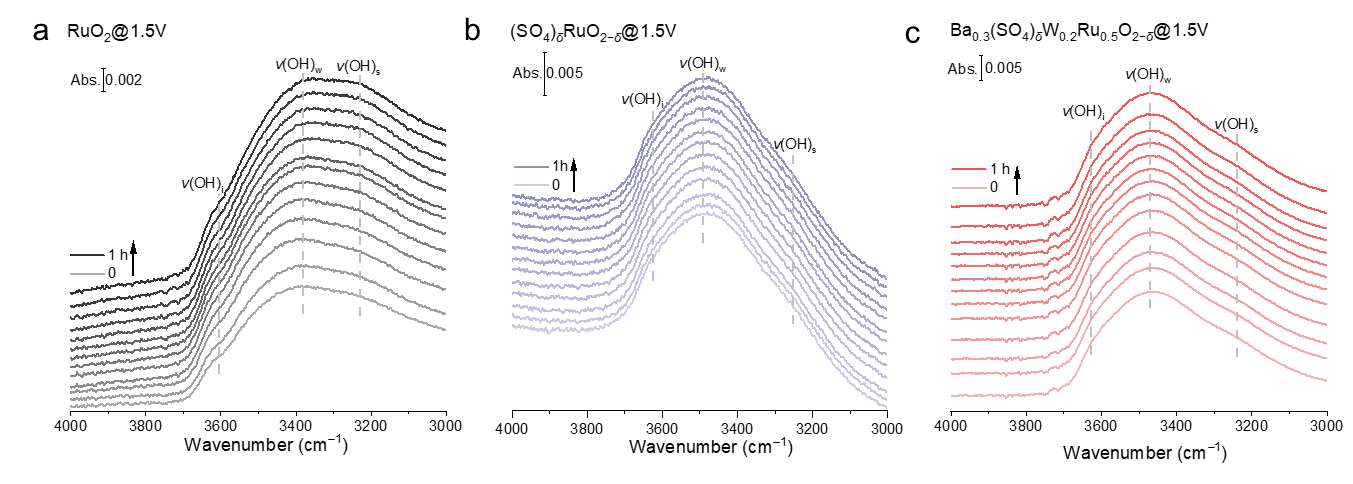
**

**Supplementary Figure 19 a-c**,Time-resolved *in-situ* ATR-SEIRAS spectra of (**a**) RuO2, (**b**) (SO4)*δ*RuO2−*δ*, and (**c**) Ba0.3(SO4)*δ*W0.2Ru0.5O2−*δ* over the course of 1 h acidic OER at 1.5 V.

**
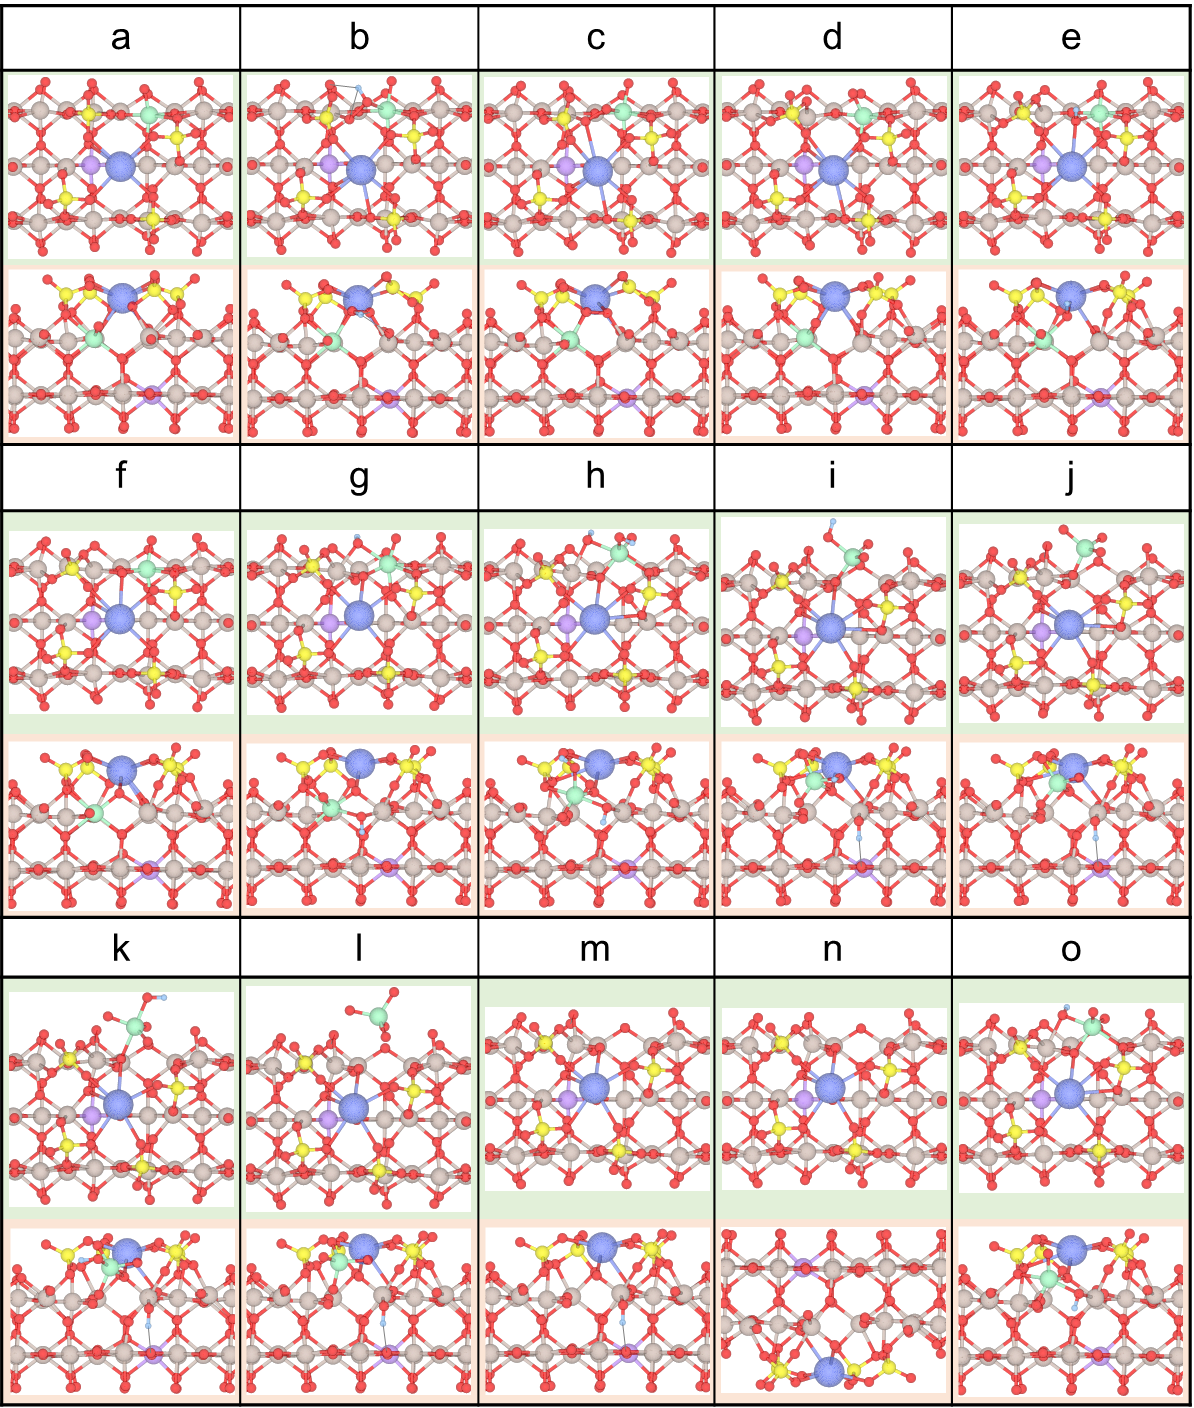
**

**Supplementary Figure 20** Atomic structures of catalysts and intermediates during Ru dissolution on Ba0.3(SO4)*δ*W0.2Ru0.5O2−*δ*.

**Supplementary Note 3**: In the most possible thermodynamic deactivation pathway of Ba0.3(SO4)*δ*W0.2Ru0.5O2−*δ*, the adsorption and deprotonation of water are optimized on the most energetically favorable sites. Benefiting from the protection of Ba-anchored sulfate, the deactivation of Ba0.3(SO4)*δ*W0.2Ru0.5O2−*δ* needs to overcome two positive free energy difference in the steps from *a* to *b* and *k* to *l*, respectively, while that of RuO2 is almost spontaneous – that means, it is more difficult and sluggish for Ba0.3(SO4)*δ*W0.2Ru0.5O2−*δ* to deactivate than RuO2.


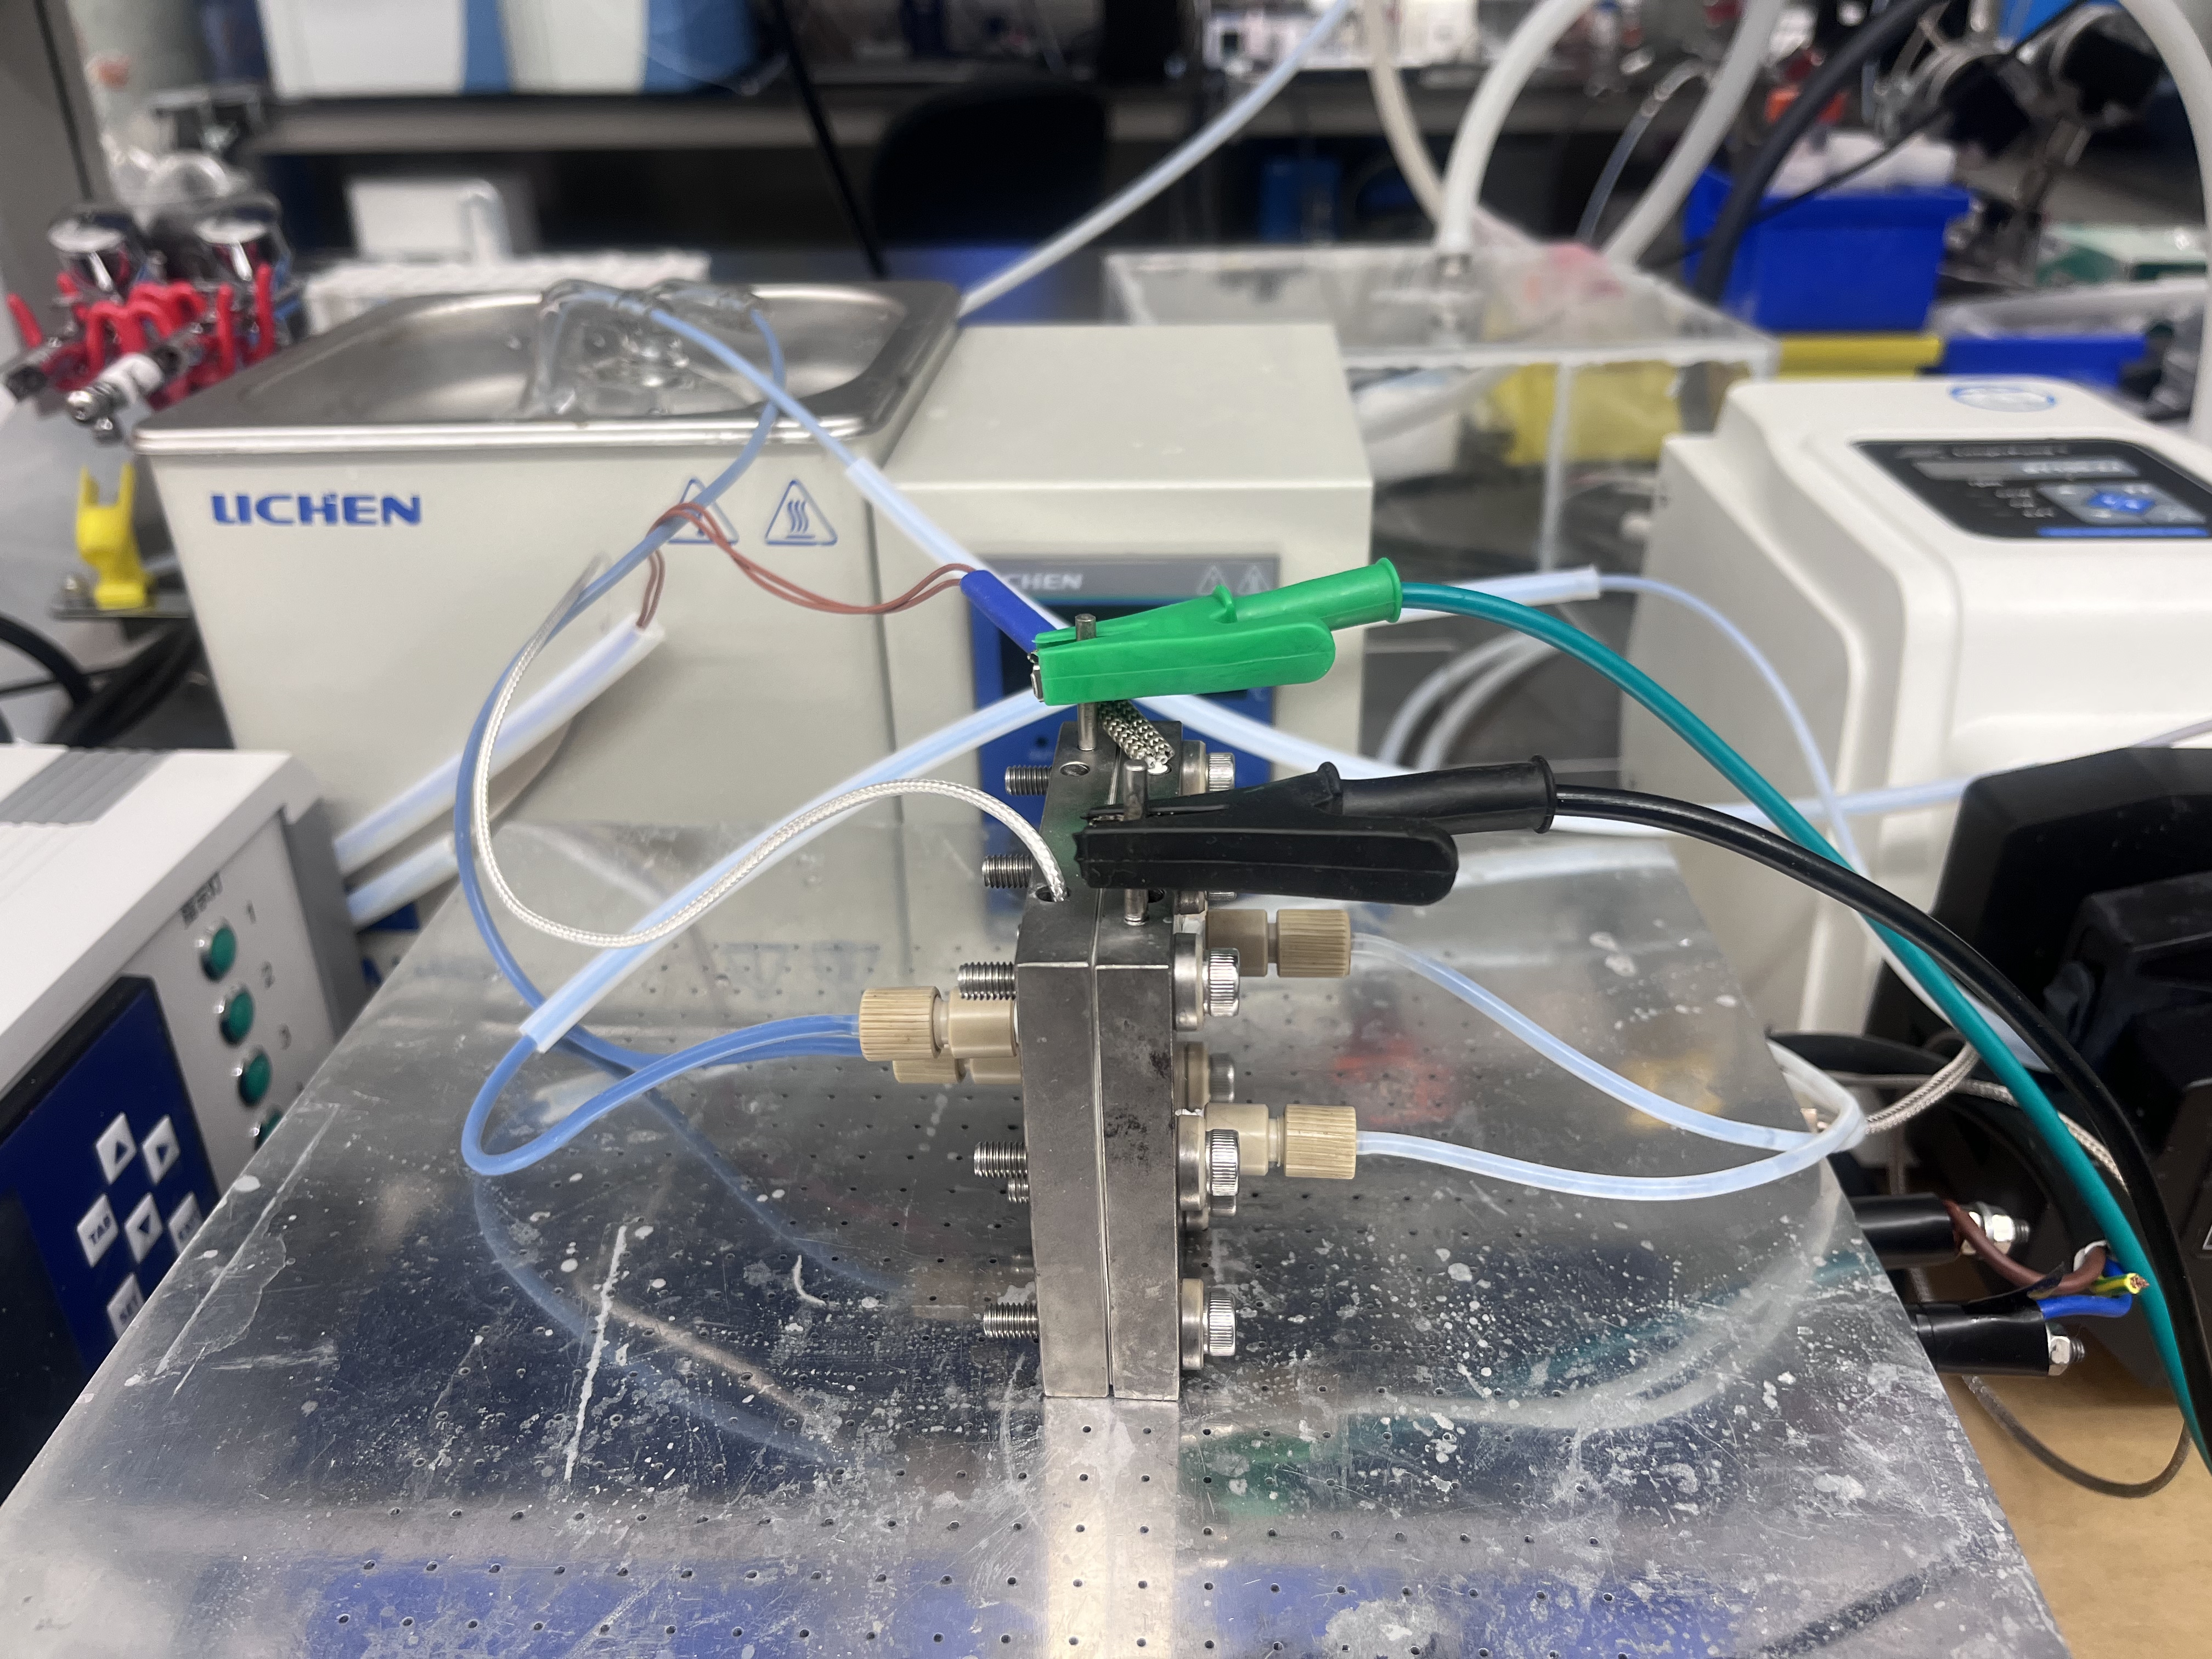


**Supplementary Figure 21** Photograph of the PEMWE.

**Supplementary Tables**

**Supplementary Table 1**. The binding energy of various metal cations with sulfate on the surface of RuO2 (110) plane.

| Metal | Binding Energy (eV) | Metal | | Binding Energy (eV) | Metal | Binding Energy (eV) | Metal | Binding Energy (eV) |
| --- | --- | --- | --- | --- | --- | --- | --- | --- |
| Au | -3.26 | Te | -7.01 | | Al | -8.65 | Re | -14.5 |
| Ag | -4.03 | Ni | -7.11 | | Fe | -8.82 | V | -14.6 |
| Cd | -4.8 | Ge | -7.23 | | Mg | -8.94 | Sc | -14.8 |
| Se | -5.15 | Pt | -7.33 | | Ir | -9.5 | Ti | -15.3 |
| Ga | -5.17 | Sn | -7.36 | | Be | -10.2 | Pr | -15.6 |
| Zn | -5.49 | Sb | -7.51 | | Sr | -10.4 | Y | -15.9 |
| Cu | -5.63 | Pb | -7.56 | | Ca | -10.5 | La | -16 |
| Pd | -5.81 | In | -7.78 | | Ru | -10.5 | Mo | -16 |
| Na | -5.92 | Co | -7.85 | | Ba | -10.8 | Ce | -17.1 |
| K | -6.04 | Bi | -7.93 | | Eu | -11.4 | Gd | -17.1 |
| Li | -6.52 | Rh | -8.01 | | Cr | -12.1 | Zr | -18.6 |
| As | -6.87 | Mn | -8.6 | | Nd | -14.5 | Nb | -19 |
| W | -19.19 | Hf | -19.3 | | Ta | -20.2 |  |  |

**Supplementary Table 2**. OER performances of the Ru-based catalysts in this work.

| Catalysts | Loading  (μg cm–2) | ECSA (cm2oxide) | Overpotential (V) @  10 mA cm–2 | *j*m @ 1.45 V  (A mg–1oxide) | *j*s @ 1.45 V  (mA cm–2oxide) |
| --- | --- | --- | --- | --- | --- |
| RuO2 | 125 | 83.4 | 279 | 0.015 | 0.004 |
| W0.3Ru0.7O2 | 125 | 52.3 | 216 | 0.103 | 0.048 |
| (SO4)*δ*RuO2-*δ* | 125 | 71.1 | 225 | 0.068 | 0.023 |
| Ba0.4(SO4)*δ*Ru0.6O2-*δ* | 125 | 54.6 | 233 | 0.051 | 0.023 |
| Ba0.3(SO4)*δ*W0.2Ru0.5O2-*δ* | 125 | 39.7 | 208 | 0.144 | 0.089 |

**Supplementary Table 3**. The amount of dissolved Ru for various catalysts after OER.

| Catalyst | Amount of dissolved Ru  (%) |
| --- | --- |
| RuO2 | 35.6 |
| W0.3Ru0.7O2 | 24.1 |
| (SO4) *δ*RuO2-*δ* | 19.2 |
| Ba0.4(SO4) *δ*Ru0.6O2-*δ* | 11.5 |
| Ba0.3(SO4) *δ*W0.2Ru0.5O2-*δ* | 7.1 |

**Supplementary Table 4**. Summary of the reported Ru-based OER catalysts under acidic conditions.

| Catalyst | Loading  (μg cm–2) | Electrolyte | Overpotential @10 mA cm–2  (mV) | Stability  @10 mA cm–2  (h) | Ref. |
| --- | --- | --- | --- | --- | --- |
| Ni-RuO2 | 400 | 0.1 M HClO4 | 214 | 200 | 1 |
| Co-RuIr | 50 | 0.1 M HClO4 | 235 | 25 | 2 |
| Faceted Ru | 127 | 0.1 M HClO4 | 180 | 4 | 3 |
| Ru1-Pt3Cu | 21 | 0.1 M HClO4 | 220 | 28 | 4 |
| BixEr2-xRu2O7 | 830 | 0.1 M HClO4 | 180 | 100 | 5 |
| Cu-doped RuO2 | 275 | 0.5 M H2SO4 | 188 | 8 | 6 |
| CaCu3Ru4O12 | 250 | 0.5 M H2SO4 | 171 | 24 | 7 |
| Cr0.6Ru0.4O2 | 283 | 0.5 M H2SO4 | 178 | 10 | 8 |
| W0.2Er0.1Ru0.7O2-δ | 330 | 0.5 M H2SO4 | 168 | 500 | 9 |
| Li0.52RuO2 | 637 | 0.5 M H2SO4 | 156 | 70 | 10 |
| Y1.7Sr0.3Ru2O7 | 71 | 0.5 M H2SO4 | 264 | 28 | 11 |
| RuNi2©G-250 | 320 | 0.5 M H2SO4 | 227 | 3 | 12 |
| Ba0.3(SO4)*δ*W0.2Ru0.5O2−*δ* | 125 | 0.5 M H2SO4 | 208 | 1,000 | This work |

**Supplementary Table 5**. Curvefit parametersa for Ru K-edge EXAFS for various samples.

| Catalyst | Path | R(Å)a | Nb | c | (eV)d | R factor |
| --- | --- | --- | --- | --- | --- | --- |
| RuO2 | Ru-O | 1.97 | 4.4 | 2.4 | −1.32 | 0.016 |
| Ru-Ru | 2.7 | 1 | 1.2 |
| Ru-O | 3.16 | 2.5 | 3.5 |
|  | Ru-O | 1.97 | 4 | 0.6 |  |  |
| Ba0.3(SO4) *δ*W0.2Ru0.5O2-*δ* | Ru-Ru | 2.69 | 1 | 4.2 | −1.71 | 0.019 |
|  | Ru-O | 3.15 | 2 | 11.4 |  |  |
| Ru foil | Ru-Ru | 2.67 | 12 | 3.6 | 3.59 | 0.013 |
| Standard RuO2 | Ru-O | 1.96 | 6 | −0.3 |  | 0.018 |
| Ru-Ru | 2.66 | 6 | −1.5 | −0.32 |
| Ru-O | 0.317 | 2 | 4.9 |  |

a*R*: Bond distance; b*N*: coordination numbers; c: Debye-Waller factors; d: the inner potential correction. R factor: goodness of fit.

**Supplementary Table 6**. Summary of the reported PEMWE stability using different Ru-based OER catalysts.

| Anode catalyst | Mass loading  (mg cm–2) | PEM | Cell temperature (°C) | Electrolyte | Current density  ( A cm–2) | Stability  (h) | Ref. |
| --- | --- | --- | --- | --- | --- | --- | --- |
| PtCo–RuO2/C | 2.5 | N212 | 80 | Distilled water | 1 | 24 | 13 |
| RuO2/SnO2 | 3 | N115 | 30 | Distilled water | 0.25 | 235 | 14 |
| RuO2 NS | 1.2 | N212 | 90 | Distilled water | 1 | 10 | 15 |
| Ni-RuO2 | ~3.1 | N117 | Room temperature | 0.1 M HClO4 | 0.2 | 1,000 | 1 |
| W0.2Er0.1Ru0.7O2−δ | Not Given | N117 | Room temperature | 0.5 M H2SO4 | 0.1 | 120 | 9 |
| Ba0.3(SO4)*δ*W0.2Ru0.5O2−*δ* | 3 | N115 | 80 | 0.5 M H2SO4 | 0.5 | 300 | This work |

**Supplementary References**

1 Wu, Z. Y. *et al.* Non-iridium-based electrocatalyst for durable acidic oxygen evolution reaction in proton exchange membrane water electrolysis. *Nat. Mater.* **22**, 100-108 (2023).

2 Shan, J., Ling, T., Davey, K., Zheng, Y. & Qiao, S. Z. Transition-metal-doped RuIr bifunctional nanocrystals for overall water splitting in acidic environments. *Adv. Mater.* **31**, e1900510 (2019).

3 Poerwoprajitno, A. R. *et al.* Formation of branched ruthenium nanoparticles for improved electrocatalysis of oxygen evolution reaction. *Small* **15**, e1804577 (2019).

4 Yao, Y. *et al.* Engineering the electronic structure of single atom Ru sites via compressive strain boosts acidic water oxidation electrocatalysis. *Nat. Catal.* **2**, 304-313 (2019).

5 Zhou, G. *et al.* Spin-related symmetry breaking induced by half-disordered hybridization in BixEr2-xRu2O7 pyrochlores for acidic oxygen evolution. *Nat. Commun.* **13**, 4106 (2022).

6 Su, J. *et al.* Assembling ultrasmall copper-doped ruthenium oxide nanocrystals into hollow porous polyhedra: Highly robust electrocatalysts for oxygen evolution in acidic media. *Adv. Mater*. **30**, 1801351 (2018).

7 Miao, X. *et al.* Quadruple perovskite ruthenate as a highly efficient catalyst for acidic water oxidation. *Nat. Commun.* **10**, 3809 (2019).

8 Lin, Y. *et al.* Chromium-ruthenium oxide solid solution electrocatalyst for highly efficient oxygen evolution reaction in acidic media. *Nat. Commun.* **10**, 162 (2019).

9 Hao, S. *et al.* Dopants fixation of ruthenium for boosting acidic oxygen evolution stability and activity. *Nat. Commun.* **11**, 5368 (2020).

10 Qin, Y. *et al.* RuO2 electronic structure and lattice strain dual engineering for enhanced acidic oxygen evolution reaction performance. *Nat. Commun.* **13**, 3784 (2022).

11 Zhang, N. *et al.* Metal substitution steering electron correlations in pyrochlore ruthenates for efficient acidic water oxidation. *ACS Nano* **15**, 8537-8548 (2021).

12 Cui, X. *et al.* Robust interface Ru centers for high-performance acidic oxygen evolution. *Adv. Mater.* **32**, e1908126 (2020).

13 Jin, H. *et al.* Safeguarding the RuO2 phase against lattice oxygen oxidation during acidic water electrooxidation. *Energy Environ. Sci.* **15**, 1119 (2022).

14 Lim, J. Y. *et al.* Highly stable RuO2/SnO2 nanocomposites as anode electrocatalysts in a PEM water electrolysis cell. *Int. J. Energy Res.* **38**, 875-883 (2014).

15 Huang, H. *et al.* Structure engineering defective and mass transfer-enhanced RuO2 nanosheets for proton exchange membrane water electrolyzer. *Nano Energy* **88**, 106276 (2021).
